# Supplementary material for: Organolanthanide η1- and η5-pyrrolyl half-sandwich compounds: synthesis, structures, and magnetic properties
Source: Royal Society of Chemistry journal article supplement (doi:10.1039/d3nj02225k), 2023-01-01
Supplement: d3nj02225k1.pdf [file d3nj02225k1.pdf]

# Supporting Information

## Organolanthanide $\eta^1$ - and $\eta^5$ -pyrrolyl half-sandwich compounds: synthesis, structures, and magnetic properties

Yeye She,<sup>a</sup> Yanhua Lu,<sup>a</sup> Chaohong Jia,<sup>a</sup> Yahong Li,<sup>\*a</sup> Yi-Quan Zhang<sup>\*b</sup> and Jin-lei Yao<sup>\*c</sup>

<sup>a</sup>College of Chemistry, Chemical Engineering and Materials Science, Soochow University, Suzhou 215123, P. R. China. E-mail: [liyahong@suda.edu.cn](mailto:liyahong@suda.edu.cn)

<sup>b</sup>Jiangsu Key Laboratory for NSLSCS, School of Physical Science and Technology, Nanjing Normal University, Nanjing 210023, China. E-mail: [zhangyiquan@njnu.edu.cn](mailto:zhangyiquan@njnu.edu.cn)

<sup>c</sup>Jiangsu Key Laboratory of Micro and Nano Heat Fluid Flow Technology and Energy Application, School of Physical Science and Technology, Suzhou University of Science and Technology, Suzhou 215009, China. E-mail: [jlyao@usts.edu.cn](mailto:jlyao@usts.edu.cn)

## Contents

|                                                                                  |           |
|----------------------------------------------------------------------------------|-----------|
| <b>1. General methods</b> .....                                                  | <b>2</b>  |
| <b>2. Computational details</b> .....                                            | <b>3</b>  |
| <b>3. Synthesis of the H<sub>2</sub>L ligand</b> .....                           | <b>8</b>  |
| <b>4. Structures and crystallographic data of complexes</b> .....                | <b>9</b>  |
| 4.1. Molecular structures of complexes .....                                     | 9         |
| 4.2. Bond lengths of complexes .....                                             | 12        |
| 4.3. Bond angles of complexes .....                                              | 13        |
| <b>5. SHAPE program details for 1, 2, and 3-4Tol</b> .....                       | <b>17</b> |
| <b>6. The ac magnetic susceptibility measurement of complexes 1 and 2.</b> ..... | <b>18</b> |
| <b>7. The <i>M-H</i> plots of complexes 1-4</b> .....                            | <b>20</b> |
| <b>8. The Curie-Weiss law fits of complexes 1-4</b> .....                        | <b>21</b> |

# 1. General methods

All the reactions were performed in a N<sub>2</sub> filled Vigor glove box. THF, hexane and toluene were dried over purple sodium benzophenone ketyl and stored with 4 Å molecular sieves. Deuteriochloroform was dried over CaH<sub>2</sub> before distilled under vacuum and stored with 4 Å molecular sieves. <sup>1</sup>H NMR spectra were recorded at the ambient temperature on Bruker Avance-III 300 MHz. Elemental analyses for C, H and N were carried out on a Perkin-Elmer 2400 analyzer. The crystals data collections were performed from a Bruker AXS three-circle goniometer with a CCD detector at low temperature. We used OLEX-2 to analyze the crystal structures. The dc analyses were performed on polycrystalline samples wrapped in a polyethylene membrane (prepared in an inert atmosphere) under a field at 1000 Oe between 2 and 300 K. The crystal data were collected with a Bruker AXS three-circle goniometer with a CCD detector at low temperature, and the crystal structures were analysed using OLEX2 crystal analysis software. The crystallographic information file (CIF) was deposited with the Cambridge Crystallographic Data Centre deposition numbers CCDC 2213167 (**1**·2THF), 2213168 (**2**), and 2258043 (**3**·4Tol).

## 2. Computational details

Both of binuclear complexes **1** and **2** have two types of magnetic center Dy<sup>III</sup> or Ho<sup>III</sup> ions. Complete-active-space self-consistent field (CASSCF) calculations on two types of Ln<sup>III</sup> fragments indicated as **1\_Dy1**, **1\_Dy2**, **2\_Ho1** and **2\_Ho2** for complexes **1** and **2** (see Figure S1) on the basis of single-crystal X-ray determined geometry have been carried out with OpenMolcas<sup>S1</sup> program package. Each of individual Ln<sup>III</sup> fragments in complexes **1** and **2** was calculated keeping the experimentally determined structures of the corresponding compounds while replacing the neighboring Ln<sup>III</sup> ions with diamagnetic Lu<sup>III</sup>.

The basis sets for all atoms are atomic natural orbitals from the ANO-RCC library: ANO-RCC-VTZP for Dy<sup>III</sup> or Ho<sup>III</sup>; VTZ for close O, C and N; VDZ for distant atoms. The calculations employed the second order Douglas-Kroll-Hess Hamiltonian, where scalar relativistic contractions were taken into account in the basis set and the spin-orbit couplings were handled separately in the restricted active space state interaction (RASSI-SO) procedure.<sup>S2,S3</sup> Active electrons in 7 active orbitals include all *f* electrons CAS(9 in 7) for Dy<sup>III</sup> and CAS(10 in 7) for Ho<sup>III</sup> in the CASSCF calculations. To exclude all the doubts, we calculated all the roots in the active space. We have mixed the maximum number of spin-free states which was possible with our hardware (all from 21 sextets, 128 from 224 quadruplets and 130 from 490 doublets for Dy<sup>III</sup>; all from 35 quintuplets, 150 from 210 triplets, 120 from 196 singles for Ho<sup>III</sup>). SINGLE\_ANISO<sup>S4-S6</sup> program was used to obtain the energy levels, *g* tensors, magnetic axes, *et al.* based on the above CASSCF/RASSI-SO calculations.

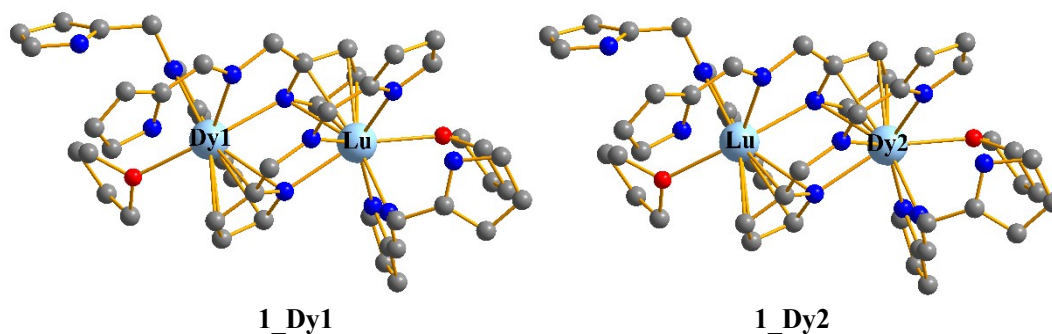

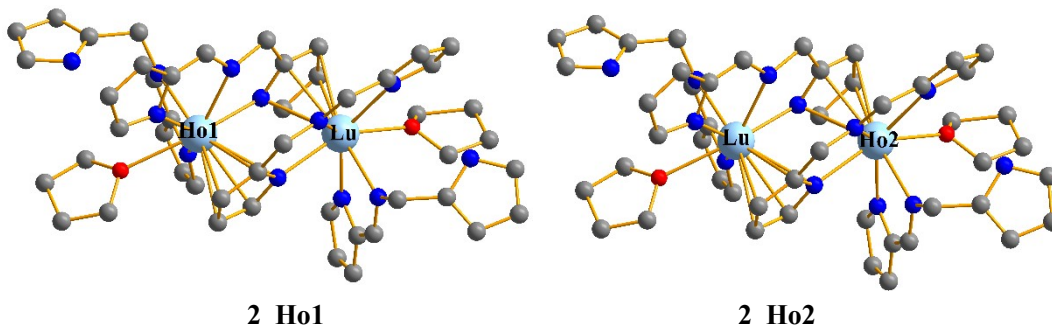

**Figure S1.** Calculated model structures of individual Ln<sup>III</sup> fragments in complexes **1** and **2**; H atoms are omitted for clarity.

**Table S1.** Calculated energy levels (cm<sup>-1</sup>), **g** ( $g_x$ ,  $g_y$ ,  $g_z$ ) tensors and predominant  $m_J$  values of the lowest eight or nine spin-orbit states of individual Ln<sup>III</sup> fragments of complexes **1** and **2** using CASSCF/RASSI-SO with OpenMolcas.

| KDs | <b>1 Dy1</b> |                          |            | <b>1 Dy2</b> |                          |            |       |
|-----|--------------|--------------------------|------------|--------------|--------------------------|------------|-------|
|     | $E$          | <b>g</b>                 | $m_J$      | $E$          | <b>g</b>                 | $m_J$      |       |
| 1   | 0.0          | 0.003<br>0.005<br>19.587 | $\pm 15/2$ | 0.0          | 0.369<br>0.428<br>17.795 | $\pm 15/2$ |       |
| 2   | 113.4        | 0.039<br>0.058<br>16.764 | $\pm 13/2$ | 103.9        | 0.027<br>0.043<br>16.735 | $\pm 13/2$ |       |
| 3   | 251.4        | 1.488<br>2.940<br>12.607 | $\pm 11/2$ | 236.4        | 1.711<br>3.718<br>12.078 | $\pm 11/2$ |       |
| 4   | 310.4        | 2.549<br>6.039<br>10.690 |            | 292.4        | 9.952<br>6.146<br>2.168  |            |       |
| 5   | 364.3        | 0.901<br>1.328<br>16.822 |            | 361.8        | 0.841<br>1.524<br>15.238 |            |       |
| 6   | 391.6        | 1.438<br>2.479<br>12.430 |            | 381.4        | 1.138<br>1.803<br>14.457 |            |       |
| 7   | 472.7        | 0.781<br>1.617<br>14.798 |            | 462.2        | 0.951<br>1.292<br>14.689 |            |       |
| 8   | 514.2        | 0.369<br>0.428<br>17.795 |            | 518.8        | 0.125<br>0.233<br>18.043 |            |       |
|     |              | <b>2 Ho1</b>             |            |              | <b>2 Ho2</b>             |            |       |
|     |              | $E$                      | <b>g</b>   | $m_J$        | $E$                      | <b>g</b>   | $m_J$ |
| 1   | 0.0          | 0.000<br>0.000           | $\pm 8$    | 0.0          | 0.000<br>0.000           | $\pm 8$    |       |
|     | 2.4          | 18.360                   |            | 3.6          | 18.196                   |            |       |

|   |       |                 |  |       |                 |  |
|---|-------|-----------------|--|-------|-----------------|--|
| 2 | 84.6  |                 |  | 74.1  |                 |  |
| 3 | 105.8 | 0.000           |  | 100.1 | 0.000           |  |
|   | 119.9 | 0.000<br>6.525  |  | 116.0 | 0.000<br>6.181  |  |
| 4 | 161.8 | 0.000           |  | 159.3 | 0.000           |  |
|   | 183.3 | 0.000<br>5.161  |  | 190.9 | 0.000<br>8.281  |  |
| 5 | 187.2 | 0.000           |  | 195.4 | 0.000           |  |
|   | 215.4 | 0.000<br>1.982  |  | 220.6 | 0.000<br>6.105  |  |
| 6 | 220.3 | 0.000           |  | 229.3 | 0.000           |  |
|   | 235.0 | 0.000<br>9.073  |  | 248.3 | 0.000<br>9.733  |  |
| 7 | 250.9 | 0.000           |  | 265.6 | 0.000           |  |
|   | 255.6 | 0.000<br>11.911 |  | 272.4 | 0.000<br>13.154 |  |
| 8 | 271.9 | 0.000           |  | 283.1 | 0.000           |  |
|   | 291.9 | 0.000<br>13.582 |  | 303.9 | 0.000<br>11.130 |  |
| 9 | 303.1 | 0.000           |  | 307.1 | 0.000           |  |
|   | 309.5 | 0.000<br>16.153 |  | 315.1 | 0.000<br>13.931 |  |

**Table S2.** Wave functions with definite projection of the total moment  $|m_J\rangle$  for the lowest several spin-orbit states of individual Ln<sup>III</sup> fragments of **1** and **2** using CASSCF/RASSI-SO with OpenMolcas.

|              | $E/\text{cm}^{-1}$ | wave functions                                                            |
|--------------|--------------------|---------------------------------------------------------------------------|
| <b>1_Dy1</b> | 0.0                | 94.8% $ \pm 15/2\rangle$                                                  |
|              | 113.4              | 92.9% $ \pm 13/2\rangle$                                                  |
|              | 251.4              | 70.7% $ \pm 11/2\rangle$ +15.2% $ \pm 7/2\rangle$ +5.4% $ \pm 3/2\rangle$ |
| <b>1_Dy2</b> | 0.0                | 94.4% $ \pm 15/2\rangle$                                                  |
|              | 103.9              | 91.3% $ \pm 13/2\rangle$                                                  |
|              | 236.4              | 64.5% $ \pm 11/2\rangle$ +16.9% $ \pm 7/2\rangle$ +7.5% $ \pm 3/2\rangle$ |
| <b>2_Ho1</b> | 0.0                | 76% $ \pm 8\rangle$ +12.2% $ \pm 6\rangle$ +6% $ \pm 4\rangle$            |
|              | 2.4                |                                                                           |
| <b>2_Ho2</b> | 0.0                | 74.6% $ \pm 8\rangle$ +12.6% $ \pm 6\rangle$ +6.8% $ \pm 4\rangle$        |
|              | 3.6                |                                                                           |

To fit the exchange interactions between Ln<sup>III</sup> ions in complexes **1** and **2**, we took two steps to obtain them. Firstly, we calculated individual Ln<sup>III</sup> fragments using CASSCF/RASSI-SO to obtain the corresponding magnetic properties. Then, the exchange interaction between the magnetic centers was considered within the Lines model,<sup>S7</sup> while the account of the dipole-dipole magnetic coupling is treated exactly.

The Lines model is effective and has been successfully used widely in the research field of 3*d* and 4*f*-elements single-molecule magnets.<sup>S8, S9</sup>

For complexes **1** and **2**, there is only one type of the effective exchange coupling constant of  $\mathcal{J}$ . The Ising exchange Hamiltonian is:

$$\hat{H}_{exch} = -\tilde{J}\hat{S}_{Ln1}\hat{S}_{Ln2} \quad (Ln = Dy^{III} \text{ for } \mathbf{1} \text{ and } Ho^{III} \text{ for } \mathbf{2}) \quad (S1)$$

where  $\tilde{J} = 25J \cos \alpha$  for **1** and  $\tilde{J} = 16J \cos \alpha$  for **2**,  $\alpha$  is the angle between the anisotropy axes on sites Ln1 and Ln2, and  $J$  is the Lines exchange coupling parameter.

The  $\tilde{S}_{Dy} = \tilde{S}_{Ho} = 1/2$  is the ground pseudospin on the Dy<sup>III</sup> sites and Ho<sup>III</sup> sites. The

total  $\tilde{J}_{total}$  is the parameter of the total magnetic interaction ( $\tilde{J}_{total} = \tilde{J}_{dipolar} + \tilde{J}_{exchange}$ ) between magnetic center ions. The dipolar magnetic couplings can be calculated exactly, while the Lines exchange coupling constants were fitted through comparison of the computed and measured magnetic susceptibilities using the POLY\_ANISO program.<sup>S4-S6</sup>

**Table S3.** Exchange energies  $E$  (cm<sup>-1</sup>), the energy differences between each exchange doublet  $\Delta_t$  (cm<sup>-1</sup>) and the main values of the  $g_z$  for the lowest two exchange doublets of **1** and **2**.

|                   | <b>1</b>           |                        |        | <b>2</b>           |                     |        |
|-------------------|--------------------|------------------------|--------|--------------------|---------------------|--------|
| exchange doublets | $E$                | $\Delta_t$             | $g_z$  | $E$                | $\Delta_t$          | $g_z$  |
| 1                 | 0.000000000<br>000 | $8.786 \times 10^{-8}$ | 18.261 | 0.000000000<br>000 | $2.271 \times 10^0$ | 13.325 |
|                   | 0.000000087<br>862 |                        |        | 2.271276782<br>816 |                     |        |
| 2                 | 1.493467782<br>915 | $2.534 \times 10^{-7}$ | 34.588 | 3.919492027<br>030 | $2.271 \times 10^0$ | 23.918 |
|                   | 1.493468036<br>275 |                        |        | 6.190756907<br>062 |                     |        |

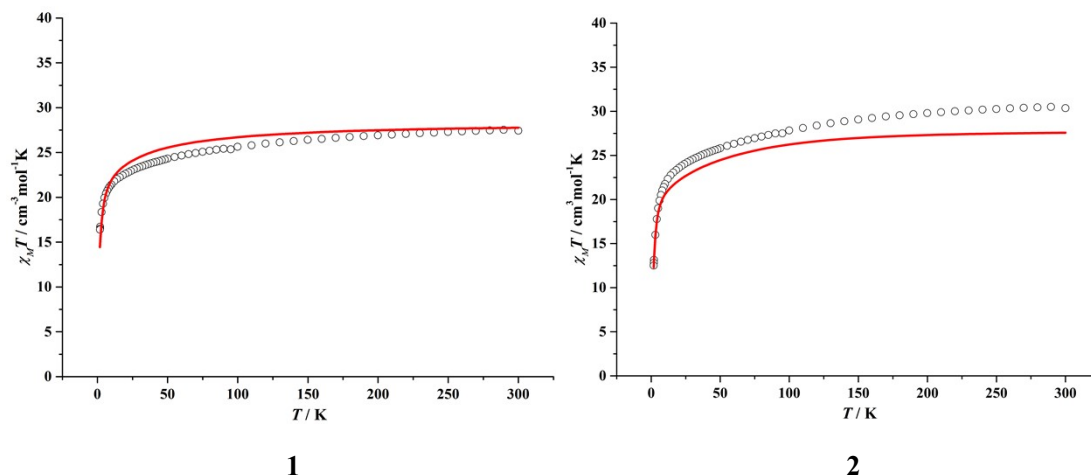

**Figure S2.** Calculated (red solid line) and experimental (black circle) data of magnetic susceptibilities of **1** and **2**. The intermolecular interaction parameters  $zJ'$  of **1** and **2** were fitted to  $-0.05$  and  $0.02$   $\text{cm}^{-1}$ , respectively.

**Table S4.** Angles between the main magnetic axes on  $\text{Ln}^{\text{III}}$  ions and connection between two metal centers for **1** and **2**.

|             | <b>1</b>      | <b>2</b>      |
|-------------|---------------|---------------|
| $\varphi_1$ | $109.9^\circ$ | $74.2^\circ$  |
| $\varphi_2$ | $108.5^\circ$ | $106.6^\circ$ |

### 3. Synthesis of the H<sub>2</sub>L ligand

Scheme S1. Synthesis of H<sub>2</sub>L<sup>S10</sup>

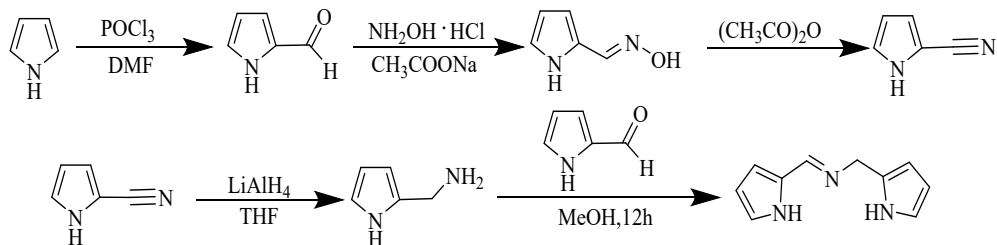

H<sub>2</sub>L. <sup>1</sup>H NMR (300 MHz, CDCl<sub>3</sub>) δ 8.35 (s, 1H), 8.13 (s, 1H), 6.79 (s, 1H), 6.70 (s, 1H), 6.52 (d, J = 2.4 Hz, 1H), 6.19 (d, J = 18.9 Hz, 2H), 6.08 (s, 1H), 4.70 (s, 2H).

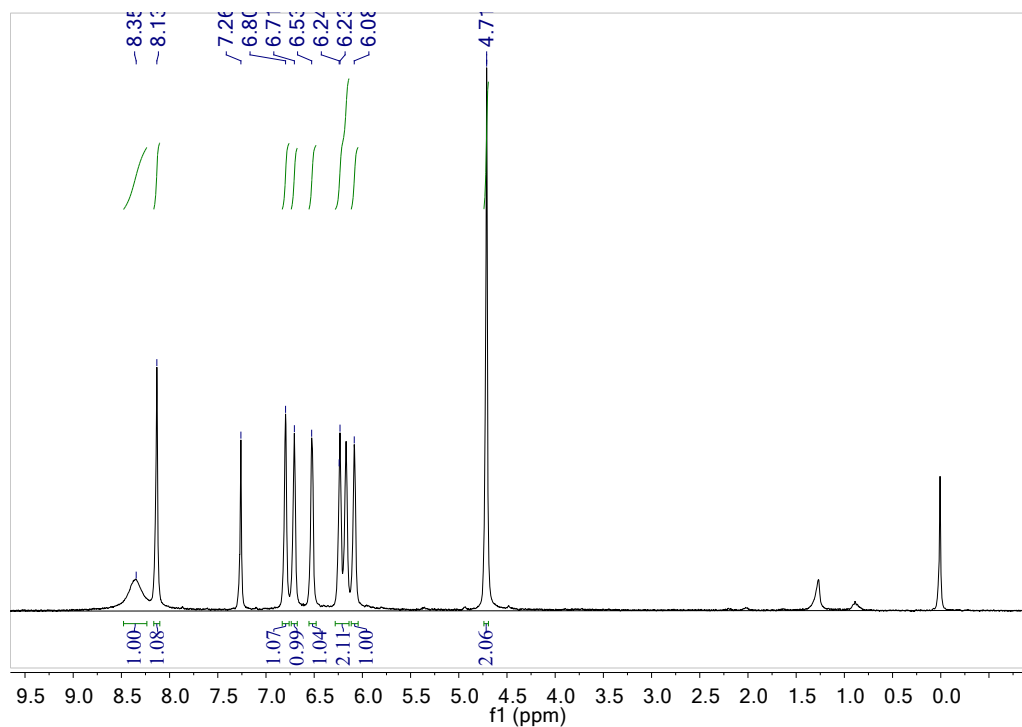

Figure S3. <sup>1</sup>H NMR spectrum of H<sub>2</sub>L.



## 4. Structures and crystallographic data of complexes

### 4.1. Molecular structures of complexes

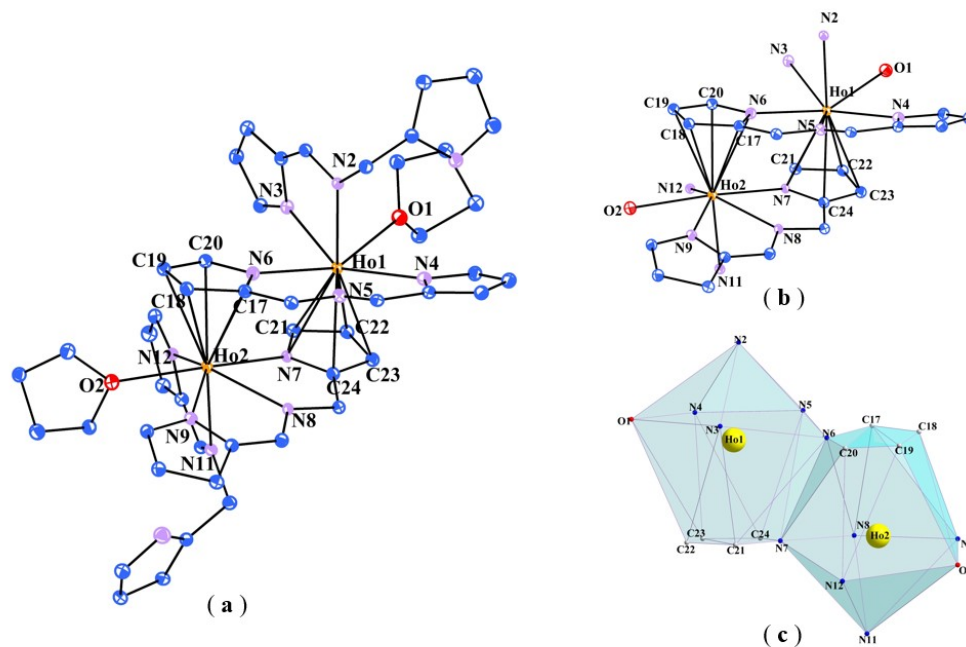

**Figure S4.** (a) Molecular structure of Complex **2** from X-ray diffraction. Hydrogen atoms are omitted for clarity. Thermal ellipsoids are drawn at the 30% probability level. (b) The central structure of complex **2**. (c) Three-dimensional shapes of the Ho<sup>III</sup> ions in **2**.

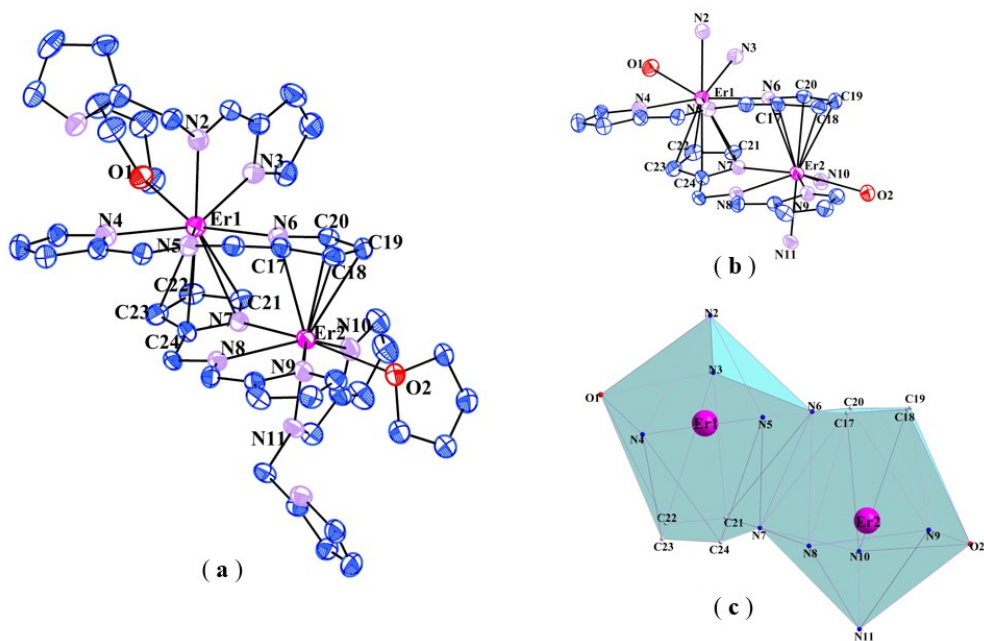

**Figure S5.** (a)Molecular structure of Complex 3·4Tol from X-ray diffraction. Hydrogen atoms and solvent molecules are omitted for clarity. Thermal ellipsoids are drawn at the 30% probability level. (b) The core structure of complex 3·4Tol. (c) Three-dimensional shapes of the Er<sup>III</sup> ions in 3·4Tol.

**Table S5. Crystallographic data and structure refinement for complexes**

|                                                              | 1·2THF                                                                               | 2                                                                              | 3·4Tol                                                                               |
|--------------------------------------------------------------|--------------------------------------------------------------------------------------|--------------------------------------------------------------------------------|--------------------------------------------------------------------------------------|
| Empirical formula                                            | C <sub>48</sub> H <sub>54</sub> Dy <sub>2</sub> N <sub>12</sub> O <sub>2</sub> ·2THF | C <sub>48</sub> H <sub>54</sub> Ho <sub>2</sub> N <sub>12</sub> O <sub>2</sub> | C <sub>48</sub> H <sub>54</sub> Er <sub>2</sub> N <sub>12</sub> O <sub>2</sub> ·4Tol |
| Formula weight                                               | 1300.24                                                                              | 1160.89                                                                        | 1534.08                                                                              |
| Crystal system                                               | triclinic                                                                            | monoclinic                                                                     | triclinic                                                                            |
| Space group                                                  | <i>P</i> -1                                                                          | <i>P</i> 2 <sub>1</sub> / <i>c</i>                                             | <i>P</i> -1                                                                          |
| <i>a</i> /Å                                                  | 11.5631(4)                                                                           | 14.4788(6)                                                                     | 11.818(4)                                                                            |
| <i>b</i> /Å                                                  | 12.6486(4)                                                                           | 20.2131(8)                                                                     | 17.795(7)                                                                            |
| <i>c</i> /Å                                                  | 19.3347(6)                                                                           | 16.9590(7)                                                                     | 18.503(7)                                                                            |
| <i>α</i> /°                                                  | 95.8290(10)                                                                          | 90                                                                             | 76.931(14)                                                                           |
| <i>β</i> /°                                                  | 102.2810(10)                                                                         | 114.2700(10)                                                                   | 72.258(13)                                                                           |
| <i>γ</i> /°                                                  | 95.0500(10)                                                                          | 90                                                                             | 73.416(13)                                                                           |
| Volume/Å <sup>3</sup>                                        | 2731.30(15)                                                                          | 4524.6(3)                                                                      | 3511(2)                                                                              |
| <i>Z</i>                                                     | 2                                                                                    | 4                                                                              | 2                                                                                    |
| $\rho_{\text{calc}}$ g/cm <sup>3</sup>                       | 1.581                                                                                | 1.704                                                                          | 1.451                                                                                |
| $\mu$ /mm <sup>-1</sup>                                      | 2.772                                                                                | 15.926                                                                         | 8.025                                                                                |
| <i>F</i> (000)                                               | 1308.0                                                                               | 2304.0                                                                         | 1556.0                                                                               |
| Crystal size/mm <sup>3</sup>                                 | 0.19 × 0.18 × 0.15                                                                   | 0.14 × 0.12 × 0.12                                                             | 0.16 × 0.14 × 0.12                                                                   |
| 2 $\theta$ range for data collection/°                       | 4.346 to 55.098                                                                      | 9.238 to 107.95                                                                | 9.214 to 108.978                                                                     |
| Index ranges                                                 | -15 ≤ <i>h</i> ≤ 15<br>-16 ≤ <i>k</i> ≤ 16<br>-25 ≤ <i>l</i> ≤ 25                    | -17 ≤ <i>h</i> ≤ 17<br>-24 ≤ <i>k</i> ≤ 24<br>-20 ≤ <i>l</i> ≤ 20              | -14 ≤ <i>h</i> ≤ 13,<br>-21 ≤ <i>k</i> ≤ 21,<br>-22 ≤ <i>l</i> ≤ 22                  |
| Reflections collected                                        | 52314                                                                                | 54230                                                                          | 31178                                                                                |
| Independent reflections                                      | 12414<br>[ <i>R</i> (int) = 0.0553]                                                  | 8166<br>[ <i>R</i> (int) = 0.0633]                                             | 12582<br>[ <i>R</i> (int) = 0.0782]                                                  |
| Data/restraints/parameters                                   | 12414/24/677                                                                         | 8166/0/577                                                                     | 12582/1910/1070                                                                      |
| Goodness-of-fit on <i>F</i> <sup>2</sup>                     | 1.061                                                                                | 1.078                                                                          | 1.123                                                                                |
| Final <i>R</i> indexes [ <i>I</i> ≥ 2 $\sigma$ ( <i>I</i> )] | <i>R</i> <sub>1</sub> = 0.0280<br><i>wR</i> <sub>2</sub> = 0.0699                    | <i>R</i> <sub>1</sub> = 0.0380<br><i>wR</i> <sub>2</sub> = 0.0989              | <i>R</i> <sub>1</sub> = 0.0713<br><i>wR</i> <sub>2</sub> = 0.1985                    |
| Final <i>R</i> indexes [all data]                            | <i>R</i> <sub>1</sub> = 0.0323<br><i>wR</i> <sub>2</sub> = 0.0745                    | <i>R</i> <sub>1</sub> = 0.0387<br><i>wR</i> <sub>2</sub> = 0.0995              | <i>R</i> <sub>1</sub> = 0.0884,<br><i>wR</i> <sub>2</sub> = 0.2183                   |
| Largest diff. peak/hole/e Å <sup>-3</sup>                    | 1.15/-0.87                                                                           | 1.90/-1.90                                                                     | 1.12/-1.68                                                                           |

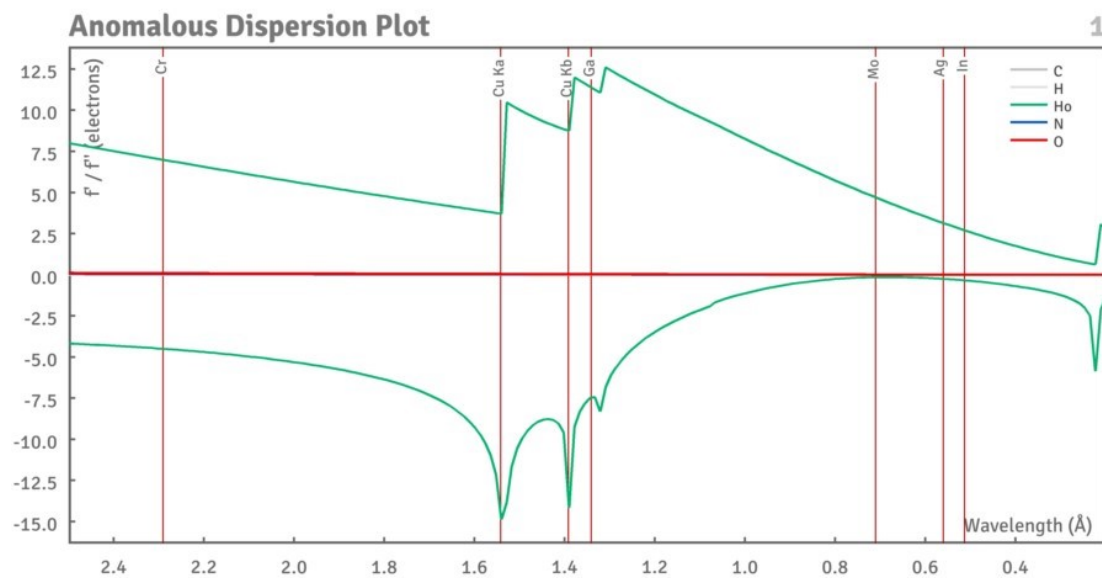

**Figure S6.** The Anomalous Dispersion plot of complex **2**.

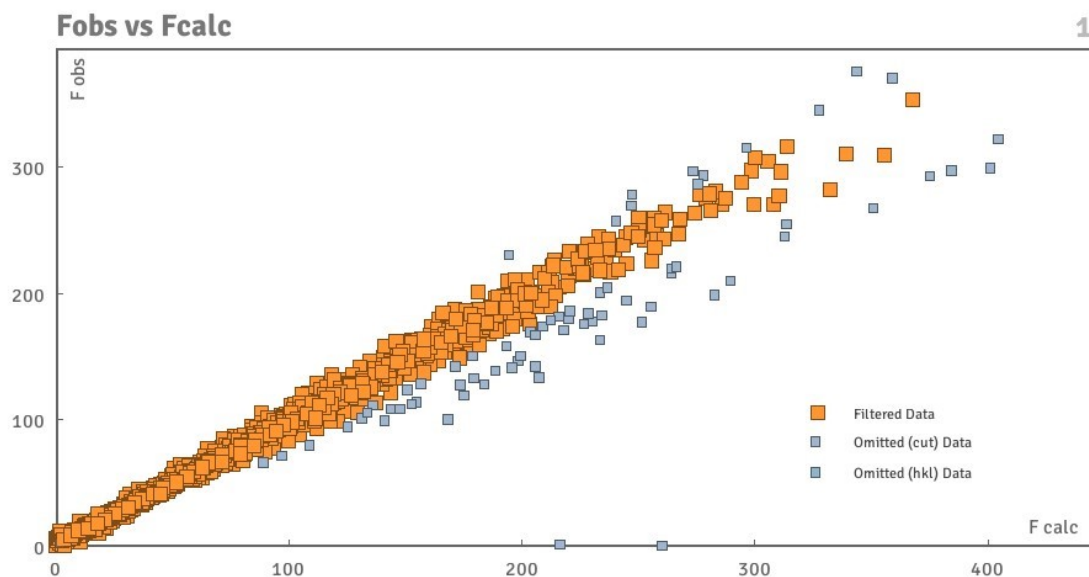

**Figure S7.** The Fobs vs Fcalc plot of complex **2**.

According to Figure S6, it is not the optimal choice to test with Ga radiation, but the instrument only has Ga radiation at the time of testing, so choose it for testing. Figure S7 is the Fobs vs Fcalc plot of complex **2**, the compound **2** crystal is difficult to cultivate, although the tested crystal is the best one among all the crystals selected, but the crystal data isn't great, and the reduction data have been tried for many times, the effect is not very ideal.

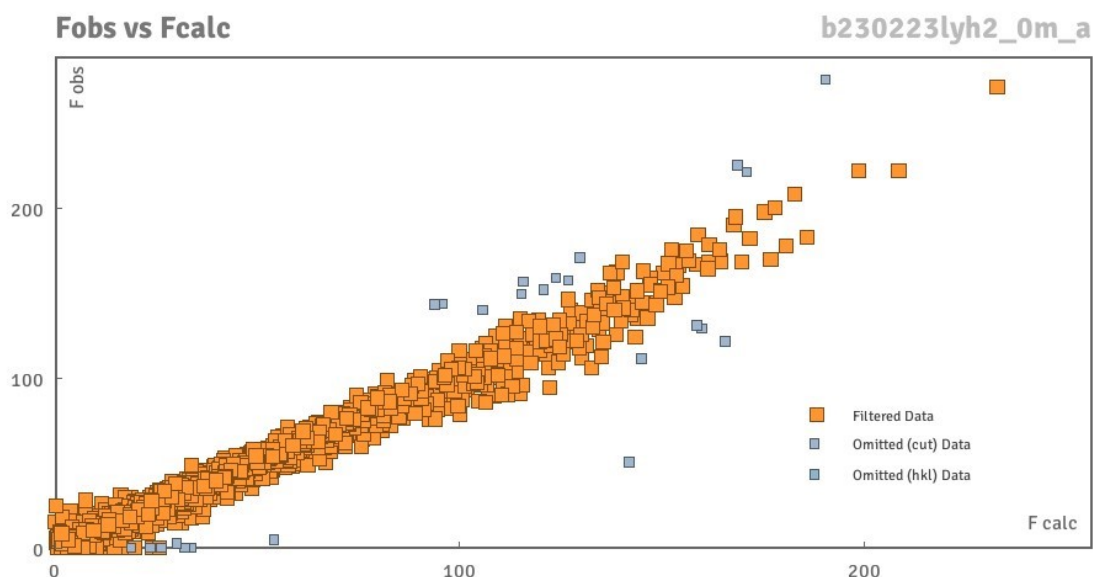

**Figure S8.** The Fobs vs Fcalc plot of complex **3-4Tol**.

Figure S8 is the Fobs vs Fcalc plot of complex **3-4Tol**. For the data of complex **3-4Tol**: Under the same test conditions, we tested three times and obtained the above data.

## 4.2. Bond lengths of complexes

**Table S6. Selected bond length data**

| 1-2THF  |          |         |          |         |          |
|---------|----------|---------|----------|---------|----------|
| Dy1-O1  | 2.533(3) | Dy1-N2  | 2.470(3) | Dy1-C30 | 2.741(4) |
| Dy1-N4  | 2.460(3) | Dy1-N6  | 2.431(3) | Dy1-C28 | 2.812(4) |
| Dy1-C29 | 2.808(4) | Dy1-C27 | 2.745(4) | Dy1-N5  | 2.495(3) |
| Dy1-N9  | 2.722(3) | Dy1-N1  | 2.408(3) | Dy2-C12 | 2.828(4) |
| Dy2-N4  | 2.704(3) | Dy2-N10 | 2.409(3) | Dy2-N11 | 2.474(3) |
| Dy2-O2  | 2.542(3) | Dy2-C13 | 2.825(4) | Dy2-C14 | 2.746(4) |
| Dy2-N8  | 2.494(3) | Dy2-C11 | 2.730(4) | Dy2-N9  | 2.471(3) |
| Dy2-N7  | 2.420(3) |         |          |         |          |
| 2       |          |         |          |         |          |
| Ho2-N12 | 2.399(3) | Ho2-O2  | 2.510(3) | Ho2-N7  | 2.443(3) |
| Ho2-N6  | 2.720(3) | Ho2-C18 | 2.798(4) | Ho2-N11 | 2.478(3) |
| Ho2-N9  | 2.440(3) | Ho2-C17 | 2.736(4) | Ho2-N8  | 2.501(3) |
| Ho2-C20 | 2.740(4) | Ho2-C19 | 2.809(4) | Ho1-N7  | 2.726(3) |
| Ho1-N2  | 2.447(3) | Ho1-N6  | 2.432(3) | Ho1-N5  | 2.481(3) |
| Ho1-N3  | 2.407(3) | Ho1-O1  | 2.589(3) | Ho1-C21 | 2.721(3) |
| Ho1-N4  | 2.432(3) | Ho1-C23 | 2.771(4) | Ho1-C22 | 2.762(4) |
| Ho1-C24 | 2.738(3) |         |          |         |          |

**3-4Tol**

|         |          |         |          |         |          |
|---------|----------|---------|----------|---------|----------|
| Er1-O1  | 2.533(4) | Er1-N2  | 2.462(5) | Er1-N3  | 2.385(5) |
| Er1-N4  | 2.428(5) | Er1-N5  | 2.469(6) | Er1-N6  | 2.439(5) |
| Er1-N7  | 2.718(5) | Er1-C21 | 2.754(7) | Er1-C22 | 2.789(7) |
| Er1-C23 | 2.773(7) | Er1-C24 | 2.726(6) | Er2-O2  | 2.519(4) |
| Er2-N6  | 2.744(5) | Er2-N7  | 2.444(5) | Er2-N8  | 2.458(5) |
| Er2-N9  | 2.413(6) | Er2-N10 | 2.386(6) | Er2-N11 | 2.444(5) |
| Er2-C17 | 2.742(7) | Er2-C18 | 2.765(7) | Er2-C19 | 2.797(7) |
| Er2-C20 | 2.748(6) |         |          |         |          |

**4.3. Bond Angles of Complexes****Table S7. Selected bond angle data**

| 1:2THF      |           |             |           |             |           |
|-------------|-----------|-------------|-----------|-------------|-----------|
| N2-Dy1-O1   | 81.17(8)  | N2-Dy1-N9   | 150.49(8) | N2-Dy1-C29  | 153.26(9) |
| N2-Dy1-C30  | 148.89(8) | N2-Dy1-C27  | 158.76(9) | N2-Dy1-C28  | 160.17(9) |
| N2-Dy1-N5   | 78.86(8)  | N4-Dy1-N2   | 81.40(8)  | N4-Dy1-O1   | 147.90(7) |
| N4-Dy1-N9   | 69.13(7)  | N4-Dy1-C29  | 112.89(8) | N4-Dy1-C30  | 84.01(8)  |
| N4-Dy1-C27  | 89.85(8)  | N4-Dy1-C28  | 116.81(8) | N4-Dy1-N5   | 64.64(8)  |
| O1-Dy1-N9   | 123.64(7) | O1-Dy1-C29  | 75.18(8)  | O1-Dy1-C30  | 97.55(8)  |
| O1-Dy1-C27  | 114.77(8) | O1-Dy1-C28  | 85.77(8)  | N9-Dy1-C29  | 48.68(8)  |
| N9-Dy1-C30  | 29.16(8)  | N9-Dy1-C27  | 29.23(7)  | N9-Dy1-C28  | 48.65(8)  |
| C29-Dy1-C28 | 29.11(9)  | N1-Dy1-N2   | 70.83(9)  | N1-Dy1-N4   | 76.28(8)  |
| N1-Dy1-O1   | 72.61(8)  | N1-Dy1-N9   | 99.60(8)  | N1-Dy1-C29  | 90.10(9)  |
| N1-Dy1-C30  | 79.09(9)  | N1-Dy1-C27  | 125.90(9) | N1-Dy1-N6   | 143.71(8) |
| N1-Dy1-C28  | 119.20(9) | N1-Dy1-N5   | 133.39(8) | C30-Dy1-C29 | 29.14(9)  |
| C30-Dy1-C27 | 47.26(8)  | C30-Dy1-C28 | 47.76(9)  | C27-Dy1-C29 | 47.72(9)  |
| C27-Dy1-C28 | 29.01(8)  | N6-Dy1-N2   | 88.93(8)  | N6-Dy1-N4   | 131.50(8) |
| N6-Dy1-O1   | 74.77(8)  | N6-Dy1-N9   | 111.57(8) | N6-Dy1-C29  | 96.61(9)  |
| N6-Dy1-C30  | 120.96(9) | N6-Dy1-C27  | 82.43(8)  | N6-Dy1-C28  | 73.20(9)  |
| N6-Dy1-N5   | 66.87(8)  | N5-Dy1-O1   | 136.70(8) | N5-Dy1-N9   | 89.66(8)  |
| N5-Dy1-C29  | 127.32(9) | N5-Dy1-C30  | 118.81(8) | N5-Dy1-C27  | 79.90(8)  |
| N5-Dy1-C28  | 101.14(9) | O2-Dy2-N4   | 122.77(7) | O2-Dy2-C13  | 84.55(8)  |
| O2-Dy2-C12  | 74.36(8)  | O2-Dy2-C11  | 96.76(7)  | O2-Dy2-C14  | 113.39(7) |
| N11-Dy2-O2  | 80.92(7)  | N11-Dy2-N4  | 152.68(7) | N11-Dy2-C13 | 157.79(8) |
| N11-Dy2-C12 | 153.04(8) | N11-Dy2-C11 | 150.74(8) | N11-Dy2-N9  | 83.44(8)  |
| N11-Dy2-C14 | 158.43(8) | N11-Dy2-N8  | 78.26(8)  | N7-Dy2-O2   | 74.57(7)  |
| N7-Dy2-N11  | 86.45(8)  | N7-Dy2-N4   | 111.49(8) | N7-Dy2-C13  | 73.50(9)  |
| N7-Dy2-C12  | 97.03(9)  | N7-Dy2-C11  | 121.29(8) | N7-Dy2-N9   | 131.38(8) |
| N7-Dy2-C14  | 82.34(9)  | N7-Dy2-N8   | 66.88(8)  | N4-Dy2-C13  | 48.57(8)  |
| N4-Dy2-C12  | 48.55(8)  | N4-Dy2-C11  | 29.39(7)  | N4-Dy2-C14  | 29.28(8)  |

|             |           |             |           |             |           |
|-------------|-----------|-------------|-----------|-------------|-----------|
| C13-Dy2-C12 | 29.04(9)  | C11-Dy2-C13 | 47.80(9)  | C11-Dy2-C12 | 29.00(9)  |
| C11-Dy2-C14 | 47.45(9)  | N9-Dy2-O2   | 148.63(7) | N9-Dy2-N4   | 69.24(7)  |
| N9-Dy2-C13  | 116.92(8) | N9-Dy2-C12  | 112.70(8) | N9-Dy2-C11  | 83.97(8)  |
| N9-Dy2-C14  | 90.22(8)  | N9-Dy2-N8   | 64.50(8)  | C14-Dy2-C13 | 28.84(8)  |
| C14-Dy2-C12 | 47.52(8)  | N10-Dy2-O2  | 73.25(7)  | N10-Dy2-N11 | 71.26(8)  |
| N10-Dy2-N7  | 143.17(8) | N10-Dy2-N4  | 100.80(8) | N10-Dy2-C13 | 120.19(8) |
| N10-Dy2-C12 | 91.15(8)  | N10-Dy2-C11 | 80.11(8)  | N10-Dy2-N9  | 76.02(8)  |
| N10-Dy2-C14 | 127.13(8) | N10-Dy2-N8  | 132.21(8) | N8-Dy2-O2   | 136.91(7) |
| N8-Dy2-N4   | 89.76(7)  | N8-Dy2-C13  | 101.72(9) | N8-Dy2-C12  | 127.69(8) |
| N8-Dy2-C11  | 119.15(8) | N8-Dy2-C14  | 80.40(8)  |             |           |

---

**2**

---

|             |            |             |            |             |            |
|-------------|------------|-------------|------------|-------------|------------|
| O1-Ho1-N7   | 125.91(9)  | O1-Ho1-C21  | 99.54(10)  | O1-Ho1-C22  | 77.39(10)  |
| O1-Ho1-C23  | 88.65(10)  | O1-Ho1-C24  | 117.71(10) | N2-Ho1-O1   | 80.10(9)   |
| N2-Ho1-N5   | 79.63(9)   | N2-Ho1-N7   | 148.81(9)  | N2-Ho1-C21  | 148.12(10) |
| N2-Ho1-C22  | 154.25(11) | N2-Ho1-C23  | 161.30(10) | N2-Ho1-C24  | 157.64(10) |
| N3-Ho1-O1   | 71.84(9)   | N3-Ho1-N2   | 70.89(10)  | N3-Ho1-N4   | 140.86(10) |
| N3-Ho1-N5   | 134.57(10) | N3-Ho1-N6   | 77.13(10)  | N3-Ho1-N7   | 99.01(9)   |
| N3-Ho1-C21  | 78.68(11)  | N3-Ho1-C22  | 90.19(11)  | N3-Ho1-C23  | 119.74(11) |
| N3-Ho1-C24  | 125.64(10) | N4-Ho1-O1   | 72.97(10)  | N4-Ho1-N2   | 86.72(10)  |
| N4-Ho1-N5   | 67.49(11)  | N4-Ho1-N6   | 131.99(11) | N4-Ho1-N7   | 115.39(9)  |
| N4-Ho1-C21  | 123.98(11) | N4-Ho1-C22  | 98.41(11)  | N4-Ho1-C23  | 75.67(10)  |
| N4-Ho1-C24  | 86.12(10)  | N5-Ho1-O1   | 136.22(9)  | N5-Ho1-N7   | 88.63(9)   |
| N5-Ho1-C21  | 117.67(10) | N5-Ho1-C22  | 125.69(10) | N5-Ho1-C23  | 98.92(10)  |
| N5-Ho1-C24  | 78.06(10)  | N6-Ho1-O1   | 147.65(9)  | N6-Ho1-N2   | 81.37(10)  |
| N6-Ho1-N5   | 64.66(10)  | N6-Ho1-N7   | 67.51(9)   | N6-Ho1-C21  | 82.87(10)  |
| N6-Ho1-C22  | 112.07(11) | N6-Ho1-C23  | 115.09(10) | N6-Ho1-C24  | 87.79(10)  |
| N7-Ho1-C22  | 48.89(10)  | N7-Ho1-C23  | 48.87(10)  | N7-Ho1-C24  | 29.31(10)  |
| C21-Ho1-N7  | 29.05(10)  | C21-Ho1-C22 | 29.59(11)  | C21-Ho1-C23 | 48.39(11)  |
| C21-Ho1-C24 | 47.49(11)  | C22-Ho1-C23 | 29.56(11)  | C24-Ho1-C22 | 48.04(11)  |
| C24-Ho1-C23 | 29.07(11)  | O2-Ho2-N6   | 124.11(9)  | O2-Ho2-C17  | 115.01(10) |
| O2-Ho2-C18  | 85.73(11)  | O2-Ho2-C19  | 75.85(10)  | O2-Ho2-C20  | 98.25(10)  |
| N6-Ho2-C17  | 29.08(10)  | N6-Ho2-C18  | 48.74(10)  | N6-Ho2-C19  | 48.40(10)  |
| N6-Ho2-C20  | 29.09(10)  | N7-Ho2-O2   | 150.33(9)  | N7-Ho2-N6   | 67.48(9)   |
| N7-Ho2-N8   | 64.43(10)  | N7-Ho2-N11  | 78.14(10)  | N7-Ho2-C17  | 87.65(10)  |
| N7-Ho2-C18  | 115.05(11) | N7-Ho2-C19  | 111.51(11) | N7-Ho2-C20  | 82.95(11)  |
| N8-Ho2-O2   | 135.81(9)  | N8-Ho2-N6   | 88.91(9)   | N8-Ho2-C17  | 78.63(10)  |
| N8-Ho2-C18  | 99.83(12)  | N8-Ho2-C19  | 125.96(11) | N8-Ho2-C20  | 118.00(10) |
| N9-Ho2-O2   | 71.74(9)   | N9-Ho2-N6   | 116.88(9)  | N9-Ho2-N7   | 130.99(10) |
| N9-Ho2-N8   | 66.85(10)  | N9-Ho2-N11  | 86.79(10)  | N9-Ho2-C17  | 87.89(10)  |
| N9-Ho2-C18  | 77.96(12)  | N9-Ho2-C19  | 100.72(12) | N9-Ho2-C20  | 125.81(11) |

|             |            |             |            |             |            |
|-------------|------------|-------------|------------|-------------|------------|
| N11-Ho2-O2  | 85.65(9)   | N11-Ho2-N6  | 145.57(10) | N11-Ho2-N8  | 77.49(9)   |
| N11-Ho2-C17 | 155.71(11) | N11-Ho2-C18 | 164.22(11) | N11-Ho2-C19 | 156.50(11) |
| N11-Ho2-C20 | 146.85(11) | N12-Ho2-O2  | 73.87(10)  | N12-Ho2-N6  | 99.46(10)  |
| N12-Ho2-N7  | 77.30(10)  | N12-Ho2-N8  | 134.04(10) | N12-Ho2-N9  | 139.77(10) |
| N12-Ho2-N11 | 70.31(10)  | N12-Ho2-C17 | 125.86(11) | N12-Ho2-C18 | 119.60(12) |
| N12-Ho2-C19 | 90.43(12)  | N12-Ho2-C20 | 79.15(11)  | C17-Ho2-C18 | 29.28(12)  |
| C17-Ho2-C19 | 47.68(12)  | C17-Ho2-C20 | 47.24(12)  | C18-Ho2-C19 | 29.17(13)  |
| C20-Ho2-C18 | 47.91(13)  | C20-Ho2-C19 | 28.97(12)  |             |            |

---

### 3-4Tol

---

|             |            |             |            |             |            |
|-------------|------------|-------------|------------|-------------|------------|
| O1-Er1-N7   | 125.50(15) | O1-Er1-C21  | 100.38(17) | O1-Er1-C22  | 76.85(18)  |
| O1-Er1-C23  | 84.85(18)  | O1-Er1-C24  | 114.27(17) | N2-Er1-O1   | 80.95(17)  |
| N2-Er1-N5   | 76.87(18)  | N2-Er1-N7   | 150.11(16) | N2-Er1-C21  | 148.98(19) |
| N2-Er1-C22  | 153.57(19) | N2-Er1-C23  | 160.1(2)   | N2-Er1-C24  | 158.45(19) |
| N3-Er1-O1   | 72.88(17)  | N3-Er1-N2   | 71.31(19)  | N3-Er1-N4   | 143.26(18) |
| N3-Er1-N5   | 132.57(19) | N3-Er1-N6   | 76.81(18)  | N3-Er1-N7   | 101.13(17) |
| N3-Er1-C21  | 79.4(2)    | N3-Er1-C22  | 88.5(2)    | N3-Er1-C23  | 117.5(2)   |
| N3-Er1-C24  | 126.43(19) | N4-Er1-O1   | 73.45(17)  | N4-Er1-N2   | 89.28(18)  |
| N4-Er1-N5   | 67.90(17)  | N4-Er1-N6   | 132.56(18) | N4-Er1-N7   | 110.17(17) |
| N4-Er1-C21  | 121.03(19) | N4-Er1-C22  | 97.8(2)    | N4-Er1-C23  | 73.3(2)    |
| N4-Er1-C24  | 81.24(18)  | N5-Er1-O1   | 135.20(17) | N5-Er1-N7   | 89.38(16)  |
| N5-Er1-C21  | 118.42(18) | N5-Er1-C22  | 129.36(19) | N5-Er1-C23  | 104.3(2)   |
| N5-Er1-C24  | 81.63(19)  | N6-Er1-O1   | 148.77(16) | N6-Er1-N2   | 82.41(17)  |
| N6-Er1-N5   | 64.72(18)  | N6-Er1-N7   | 67.71(16)  | N6-Er1-C21  | 81.11(19)  |
| N6-Er1-C22  | 110.0(2)   | N6-Er1-C23  | 116.36(18) | N6-Er1-C24  | 89.79(17)  |
| N7-Er1-C21  | 29.11(17)  | N7-Er1-C22  | 48.66(18)  | N7-Er1-C23  | 49.03(18)  |
| N7-Er1-C24  | 29.16(17)  | C21-Er1-C22 | 29.0(2)    | C21-Er1-C23 | 47.8(2)    |
| C23-Er1-C22 | 29.1(2)    | C24-Er1-C21 | 47.1(2)    | C24-Er1-C22 | 47.77(19)  |
| C24-Er1-C23 | 29.49(19)  | O2-Er2-N6   | 126.53(15) | O2-Er2-C17  | 115.68(17) |
| O2-Er2-C18  | 85.88(18)  | O2-Er2-C19  | 77.79(17)  | O2-Er2-C20  | 101.23(17) |
| N6-Er2-C18  | 48.96(18)  | N6-Er2-C19  | 48.75(17)  | N6-Er2-C20  | 29.42(18)  |
| N7-Er2-O2   | 148.27(17) | N7-Er2-N6   | 67.22(16)  | N7-Er2-N8   | 64.99(17)  |
| N7-Er2-N11  | 81.81(17)  | N7-Er2-C17  | 89.00(18)  | N7-Er2-C18  | 115.84(19) |
| N7-Er2-C19  | 109.48(18) | N7-Er2-C20  | 80.32(19)  | N8-Er2-O2   | 134.88(15) |
| N8-Er2-N6   | 89.09(16)  | N8-Er2-C17  | 81.16(18)  | N8-Er2-C18  | 104.2(2)   |
| N8-Er2-C19  | 129.19(19) | N8-Er2-C20  | 118.39(18) | N9-Er2-O2   | 73.39(17)  |
| N9-Er2-N6   | 110.68(17) | N9-Er2-N7   | 132.78(18) | N9-Er2-N8   | 67.82(17)  |
| N9-Er2-N11  | 89.16(18)  | N9-Er2-C17  | 82.04(19)  | N9-Er2-C18  | 74.0(2)    |
| N9-Er2-C19  | 98.4(2)    | N9-Er2-C20  | 122.1(2)   | N10-Er2-O2  | 72.68(17)  |
| N10-Er2-N6  | 101.66(17) | N10-Er2-N7  | 76.54(18)  | N10-Er2-N8  | 132.13(18) |
| N10-Er2-N9  | 142.75(19) | N10-Er2-N11 | 70.83(19)  | N10-Er2-C17 | 126.96(19) |
| N10-Er2-C18 | 118.0(2)   | N10-Er2-C19 | 89.1(2)    | N10-Er2-C20 | 79.6(2)    |
| N11-Er2-O2  | 81.05(16)  | N11-Er2-N6  | 149.01(16) | N11-Er2-N8  | 76.31(18)  |
| N11-Er2-C17 | 157.47(19) | N11-Er2-C18 | 161.12(19) | N11-Er2-C19 | 154.4(2)   |



|             |          |             |           |             |           |
|-------------|----------|-------------|-----------|-------------|-----------|
| N11-Er2-C20 | 148.2(2) | C17-Er2-N6  | 28.86(17) | C17-Er2-C18 | 29.88(19) |
| C17-Er2-C19 | 48.1(2)  | C17-Er2-C20 | 47.6(2)   | C18-Er2-C19 | 29.0(2)   |
| C20-Er2-C18 | 48.2(2)  | C20-Er2-C19 | 29.3(2)   |             |           |

---

## 5. SHAPE program details for 1·2THF, 2, and 3·4Tol

**Table S8.** Shape analysis for eleven-coordinated Ln<sup>III</sup> ions of complexes 1·2THF, 2, and 3·4Tol

| Agreement factor for Ln <sup>III</sup> ions in complexes | <i>HP</i> -11 | <i>DPY</i> -11 | <i>EBPY</i> -11 | <i>JCPPR</i> -11 | <i>JCPAPR</i> -11 | <i>JAPPR</i> -11 | <i>JASPC</i> -11 |
|----------------------------------------------------------|---------------|----------------|-----------------|------------------|-------------------|------------------|------------------|
| Dy1 <sup>III</sup> in 1·2THF                             | 36.376        | 26.640         | 21.942          | <b>11.062</b>    | 13.167            | 15.816           | 16.191           |
| Dy2 <sup>III</sup> in 1·2THF                             | 36.661        | 26.553         | 21.869          | <b>10.992</b>    | 13.222            | 15.943           | 16.220           |
| Ho1 <sup>III</sup> in 2                                  | 36.303        | 26.697         | 21.939          | <b>10.701</b>    | 13.214            | 16.444           | 16.284           |
| Ho2 <sup>III</sup> in 2                                  | 35.700        | 26.302         | 21.763          | <b>10.947</b>    | 13.235            | 15.953           | 16.460           |
| Er1 <sup>III</sup> in 3·4Tol                             | 36.351        | 26.627         | 21.645          | <b>11.419</b>    | 12.657            | 15.785           | 15.857           |
| Er2 <sup>III</sup> in 3·4Tol                             | 36.172        | 26.582         | 21.569          | <b>11.258</b>    | 12.618            | 15.783           | 15.829           |

*HP*-11 ( $D_{11h}$ ) = Hendecagon, *DPY*-11 ( $C_{10v}$ ) = Decagonal pyramid, *EBPY*-11 ( $D_{9h}$ ) = Enneagonal bipyramid, *JCPPR*-11 ( $C_{5v}$ ) = Capped pentagonal prism, *JCPAPR*-11 ( $C_{5v}$ ) = Capped pentagonal antiprism, *JAPPR*-11 ( $C_{2v}$ ) = Augmented pentagonal prism, *JASPC*-11( $C_s$ ) = Augmented sphenocorona.

## 6. The AC magnetic susceptibility measurement of complexes 1 and 2

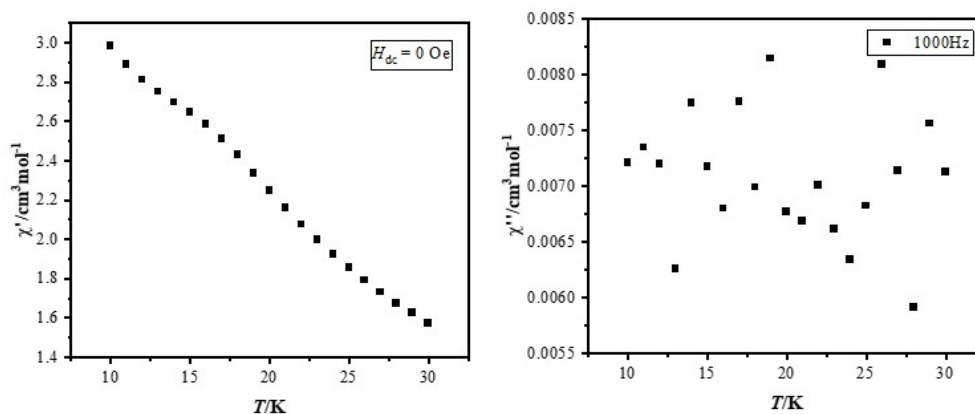

**Figure S9.** Temperature dependence of the in-phase  $\chi'$  (left) and out-of-phase  $\chi''$  (right) susceptibilities for complex 1 at 0 Oe dc field and the frequency of 1000 Hz between 10 and 30 K.

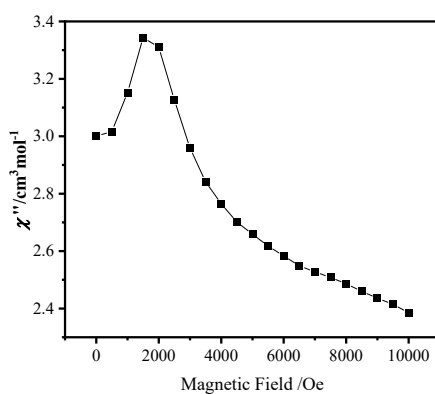

**Figure S10.** Magnetic field dependence of the out-of-phase ( $\chi''$ ) susceptibilities for 1 in the 0-10000 Oe dc field (at temperature of 10 K and frequency of 1000 Hz).

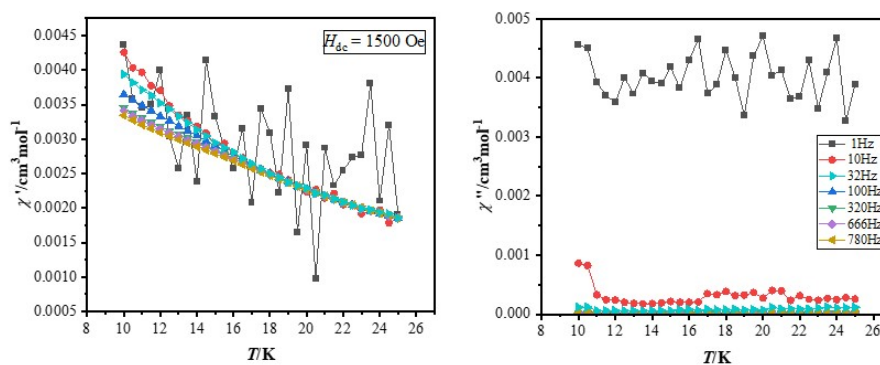

**Figure S11.** Temperature dependence of the in-phase  $\chi'$  (left) and out-of-phase  $\chi''$  (right) susceptibilities for complex 1 at 1500 Oe dc field between 10 and 25 K.

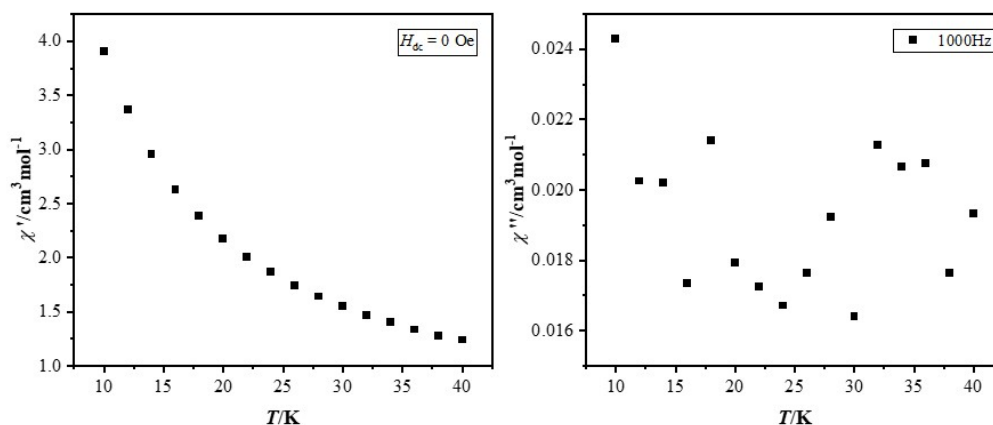

**Figure S12.** Temperature dependence of the in-phase  $\chi'$  (left) and out-of-phase  $\chi''$  (right) susceptibilities for complex **2** at 0 Oe dc field and the frequency of 1000 Hz between 10 and 40 K.

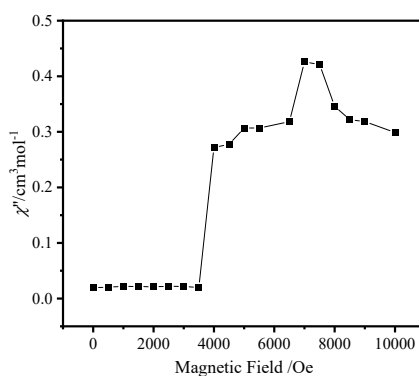

**Figure S13.** Magnetic field dependence of the out-of-phase ( $\chi''$ ) susceptibilities for **2** in the 0-10000 Oe dc field (at temperature of 10 K and frequency of 1000 Hz).

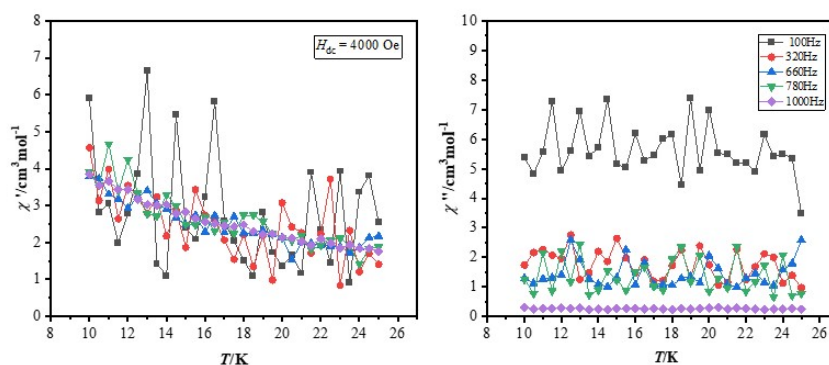

**Figure S14.** Temperature dependence of the in-phase  $\chi'$  (left) and out-of-phase  $\chi''$  (right) susceptibilities for complex **2** at 4000 Oe dc field between 10 and 25 K.

## 7. The $M$ - $H$ plots of complexes 1-4.

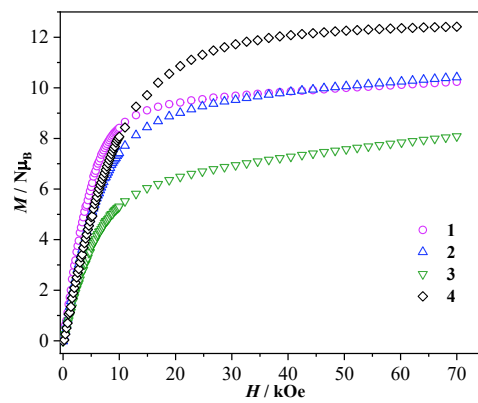

Figure S15.  $M$  -  $H$  plots for complexes 1 ~ 4 at 2 K.

## 8. The Curie-Weiss law fits of complexes 1-4.

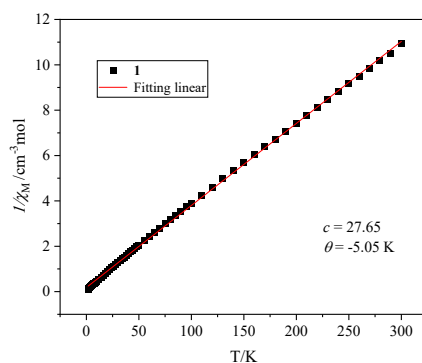

**Figure S16.** Plot of  $1/\chi_M$  versus  $T$  for **1** and the linear fits represent the Curie-Weiss law fit at 1 kOe field.

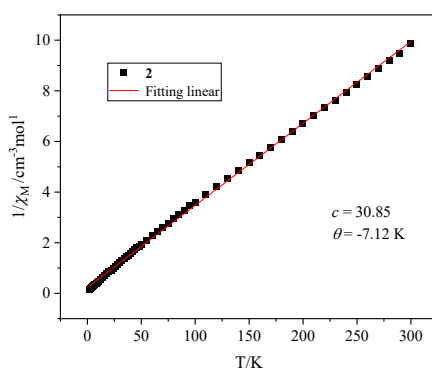

**Figure S17.** Plot of  $1/\chi_M$  versus  $T$  for **2** and the linear fits represent the Curie-Weiss law fit at 1 kOe field.

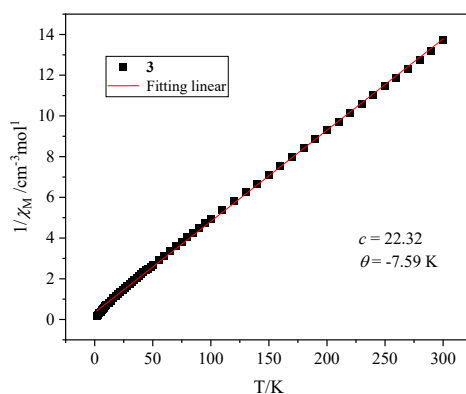

**Figure S18.** Plot of  $1/\chi_M$  versus  $T$  for **3** and the linear fits represent the Curie-Weiss law fit at 1 kOe field.

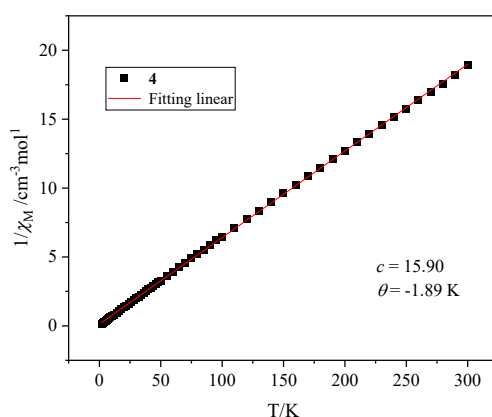

**Figure S19.** Plot of  $1/\chi_M$  versus  $T$  for **4** and the linear fits represent the Curie-Weiss law fit at 1 kOe field.

### References:

- [1] F. Galván, M. Vacher, A. Alavi, C. Angeli, F. Aquilante, J. Autschbach, J. J. Bao, S. I. Bokarev, N. A. Bogdanov, R. K. Carlson, L. F. Chibotaru, J. Creutzberg, N. Dattani, M. G. Delcey, S. S. Dong, A. Dreuw, L. Freitag, L. M. Frutos, L. Gagliardi, F. Gendron, A. Giussani, L. González, G. Grell, M. Y. Guo, C. E. Hoyer, M. Johansson, S. Keller, S. Knecht, G. Kovacevic, E. Källman, G. L. Manni, M. Lundberg, Y. J. Ma, S. Mai, J. P. Malhado, P. Å. Malmqvist, P. Marquetand, S. A. Mewes, J. Norell, M. Olivucci, M. Oppel, Q. M. Phung, K. Pierloot, F. Plasser, M. Reiher, A. M. Sand, I. Schapiro, P. Sharma, C. J. Stein, L. K. Sørensen, D. G. Truhlar, M. Ugandi, L. Ungur, A. Valentini, S. Vancollie, V. Veryazov, O. Weser, T. A. Wesolowski, Per-Olof. Widmark, S. Wouters,; A. Zech, J. P. Zobel and R. Lindh, *J. Chem. Theory Comput.*, 2019, **15**, 5925-5964.
- [2] P. Å. Malmqvist, B. O. Roos and B. Schimmelpfennig, *Chem. Phys. Lett.*, 2002, **357**, 230-240.
- [3] B. A. Heß, C. M. Marian, U. Wahlgren and O. Gropen, *Chem. Phys. Lett.*, 1996, **251**, 365-371.
- [4] L. F. Chibotaru, L. Ungur and A. Soncini, *Angew. Chem., Int. Ed.*, 2008, **47**, 4126-4129.
- [5] L. Ungur, W. Van den Heuvel and L. F. Chibotaru, *New J. Chem.*, 2009, **33**, 1224-1230.
- [6] L. F. Chibotaru, L. Ungur, C. Aronica, H. Elmoll, G. Pilet and D. Luneau, *J. Am. Chem. Soc.*, 2008, **130**, 12445-12455.
- [7] M. E. Lines, *J. Chem. Phys.*, 1971, **55**, 2977-2984.
- [8] K. C. Mondal, A. Sundt, Y. H. Lan, G. E. Kostakis, O. Waldmann, L. Ungur, L. F. Chibotaru, C. E. Anson and A. K. Powell, *Angew. Chem., Int. Ed.*, 2012, **51**, 7550-7554.
- [9] S. K. Langley, D. P. Wielechowski, V. Vieru, N. F. Chilton, B. Moubaraki, B. F. Abrahams, L. F. Chibotaru and K. S. Murray, *Angew. Chem., Int. Ed.*, 2013, **52**, 12014-12019.
- [10] Y. L. Wang, Y. Dang, H. F. Pan, Y. Ge, Z. L. Jiang, S. W. Xia and Y. H. Li, *Chinese J. Struct. Chem.*, 2019, **38**, 1797-1806.
